# Supplementary material for: A combined experimental-computational study of benzoxaborole crystal structures
Source: Royal Society of Chemistry journal article supplement (doi:10.1039/c4ce00313f), 2014-01-01

## SUPPORTING INFORMATION

### A combined experimental-computational study of benzoxaborole crystal structures

S. Sene, D. Berthomieu, B. Donnadieu, S. Richeter, J. Vezzani, D. Granier, S. Bégu, H. Mutin, C. Gervais, and D. Laurencin

| Page | Content                                                                                                                                                                                            |
|------|----------------------------------------------------------------------------------------------------------------------------------------------------------------------------------------------------|
| S2   | Details on the Le Bail refinement procedure of the XRD powder patterns.                                                                                                                            |
| S3   | <b>Figure S1:</b> XRD powder patterns of AN2690 and BBzx and Le Bail refinements.                                                                                                                  |
| S4   | <b>Figure S2:</b> Solution NMR characterizations of AN2690: * $^1\text{H}$ , $^{13}\text{C}$ , $^{19}\text{F}$ and $^{11}\text{B}$ NMR spectra; * 2D $^1\text{H}$ - $^{13}\text{C}$ HMQC spectrum. |
| S5   | <b>Table S1:</b> Peak assignments and J couplings on the $^1\text{H}$ , $^{13}\text{C}$ and $^{19}\text{F}$ NMR spectra of AN2690.                                                                 |
| S6   | <b>Figure S3:</b> Solution NMR characterizations of BBzx: * $^1\text{H}$ , $^{13}\text{C}$ , and $^{11}\text{B}$ NMR spectra; * 2D $^1\text{H}$ - $^{13}\text{C}$ HMQC spectrum.                   |
| S7   | <b>Table S2:</b> Peak assignments and J couplings on the $^1\text{H}$ and $^{13}\text{C}$ NMR spectra of BBzx.                                                                                     |
| S8   | <b>Figure S4:</b> TGA characterizations of AN2690 and BBzx.                                                                                                                                        |
| S9   | <b>Figure S5:</b> Comparison of the XRD powder patterns of AN2690 and BBzx, to those simulated from previously published crystal structures of these two molecules.                                |
| S10  | <b>Table S3:</b> Comparison of the single-crystal X-ray data of the different structures of AN2690 and BBzx.                                                                                       |
| S11  | <b>Figure S6:</b> Comparison of the single crystal structures of AN2690.                                                                                                                           |
| S12  | <b>Figure S7:</b> Hirshfeld surface fingerprint plots of the two single crystal structures of AN2690.                                                                                              |
| S13  | <b>Figure S8:</b> Comparison of the experimental structures of the two polymorphs of BBzx.                                                                                                         |
| S14  | <b>Table S4:</b> Comparison of geometrical parameters in a molecular dimer of AN2690 after DFT relaxation, and in the two crystal structures reported so far.                                      |
| S15  | <b>Table S5:</b> PED analysis of the vibrational modes calculated for a dimer model of AN2690.                                                                                                     |
| S17  | <b>Table S6:</b> List of vibration frequencies calculated for a dimer model of BBzx.                                                                                                               |
| S18  | <b>Figure S9:</b> Comparison between experimental and calculated $^1\text{H}$ NMR spectra of AN2690 and BBzx.                                                                                      |
| S19  | <b>Figure S10:</b> Comparison between experimental and calculated $^{13}\text{C}$ NMR spectra of AN2690 and BBzx.                                                                                  |
| S20  | <b>Table S7:</b> GIPAW-calculated $^1\text{H}$ , $^{13}\text{C}$ , $^{11}\text{B}$ , $^{19}\text{F}$ and $^{17}\text{O}$ NMR parameters for different periodic models of the AN2690 structure.     |
| S21  | <b>Table S8:</b> GIPAW-calculated $^1\text{H}$ , $^{13}\text{C}$ , $^{11}\text{B}$ , and $^{17}\text{O}$ NMR parameters for different periodic models of the BBzx structure.                       |
| S22  | <b>Table S9:</b> Comparison of the geometrical parameters in different periodic models of AN2690 after DFT relaxation, and in the two crystal structures reported so far.                          |

## Details on the Le Bail refinement procedure of the XRD powder patterns of AN2690 and BBzx

The XRD data of both micro-crystalline phases were recorded in the Debye-Scherrer configuration and capillary configuration on a XPERTPro Panalytical two circles powder diffractometer equipped with a monochromatized Cu  $K\alpha_1$  radiation. The indexation process was carried out using the Dicol subroutine integrated in the Fullprof suite software,<sup>1</sup> a whole-pattern decomposition fitting mode known as the Le Bail fitting<sup>2</sup> with a constant scale factor and using a Pearson pseudo-Voigt function profil for the refinement. The zero point of detector and lattice constants were refined in the first round, then peak shape and full-width-at-half-minimum parameters (U, V, W and X) were added; the background parameters, asymmetry parameters (Asy1, Asy2, Asy3, Asy4) were also refined in the last cycles of refinements. Finally, instrumental or physical aberration corrections were added to the least squares refinement by using parameters sycos and sysin. Results of refinement are depicted in the table below, and in Figure S1 (ESI).

### Lattice constants and Le Bail refinement results from X-ray diffraction (with $\lambda = 1.5406 \text{ \AA}$ ) for 5-fluoro-1,3-dihydro-1-hydroxy-2,1-benzoxaborole (AN2690) and 1,3-dihydro-1-hydroxy-2,1-benzoxaborole (BBzx).

|                                      | AN2690      | BBzx        |
|--------------------------------------|-------------|-------------|
| Temperature (K)                      | 293         | 293         |
| Wavelength ( $\text{\AA}$ )          | 1.5406      | 1.5406      |
| Space group                          | <i>P</i> -1 | <i>P</i> -1 |
| <i>a</i> ( $\text{\AA}$ )            | 4.0289(14)  | 4.4567(19)  |
| <i>b</i> ( $\text{\AA}$ )            | 6.321(2)    | 6.155(3)    |
| <i>c</i> ( $\text{\AA}$ )            | 14.059(6)   | 25.028(10)  |
| $\alpha$ ( $^\circ$ )                | 97.068(3)   | 96.345(4)   |
| $\beta$ ( $^\circ$ )                 | 91.032(3)   | 90.783(3)   |
| $\gamma$ ( $^\circ$ )                | 100.601(3)  | 102.434(4)  |
| <i>V</i> ( $\text{\AA}^3$ )          | 348.95(2)   | 665.8(5)    |
| Z                                    | 2           | 4           |
| Number of independent reflections    | 162         | 146         |
| Number of global refined parameters  | 1           | 1           |
| Number of profile refined parameters | 9           | 9           |
| R <sub>p</sub> (%)                   | 13.9        | 10.5        |
| R <sub>wp</sub> (%)                  | 14.2        | 11.9        |
| R <sub>exp</sub> (%)                 | 4.51        | 4.04        |
| Chie <sup>2</sup>                    | 8.62        | 7.81        |

<sup>1</sup> Fullprof 2000 version July 2001, Juan Rodriguez-Carvajal, Laboratoire Leon Brillouin (CEA-CNRS), 91191 Gif sur Yvette Cedex, France.

<sup>2</sup> A. LeBail, H. Duroy and J.L. Fourquet, *Mat. Res. Bull.* 1988, **23**, 447.

**Figure S1.** Le Bail refinements of the XRD powder patterns (recorded in capillary mode) for AN2690 and BBzx. Experimental XRD patterns are in red, and calculated ones (Le Bail method) in black. The fitting difference curve is in blue, and the Bragg peak positions in green.

**a/ AN2690**

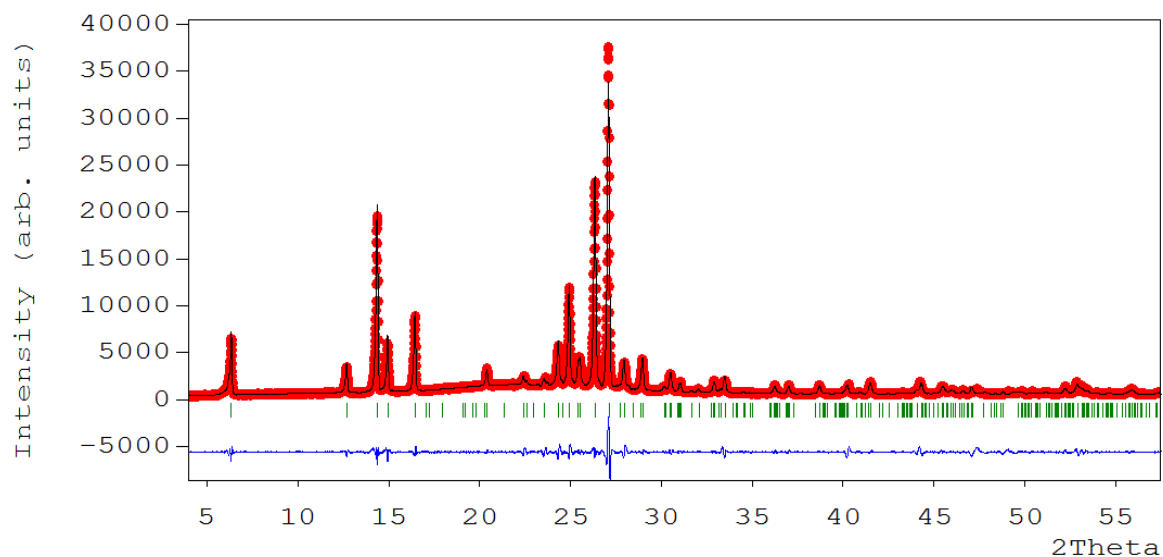

**b/ BBzx**

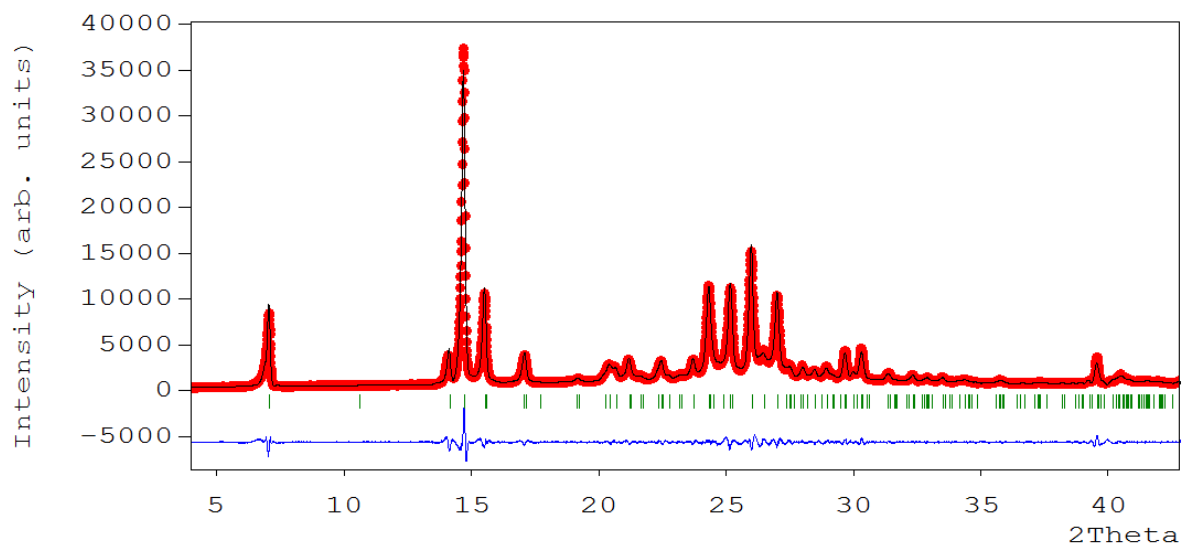

**Figure S2.**  $^1\text{H}$ ,  $^{13}\text{C}$ ,  $^{19}\text{F}$  and  $^{11}\text{B}$  NMR spectra, and 2D  $^1\text{H}$ - $^{13}\text{C}$  HMQC spectrum of AN2690, recorded in  $\text{DMSO-d}^6$ .

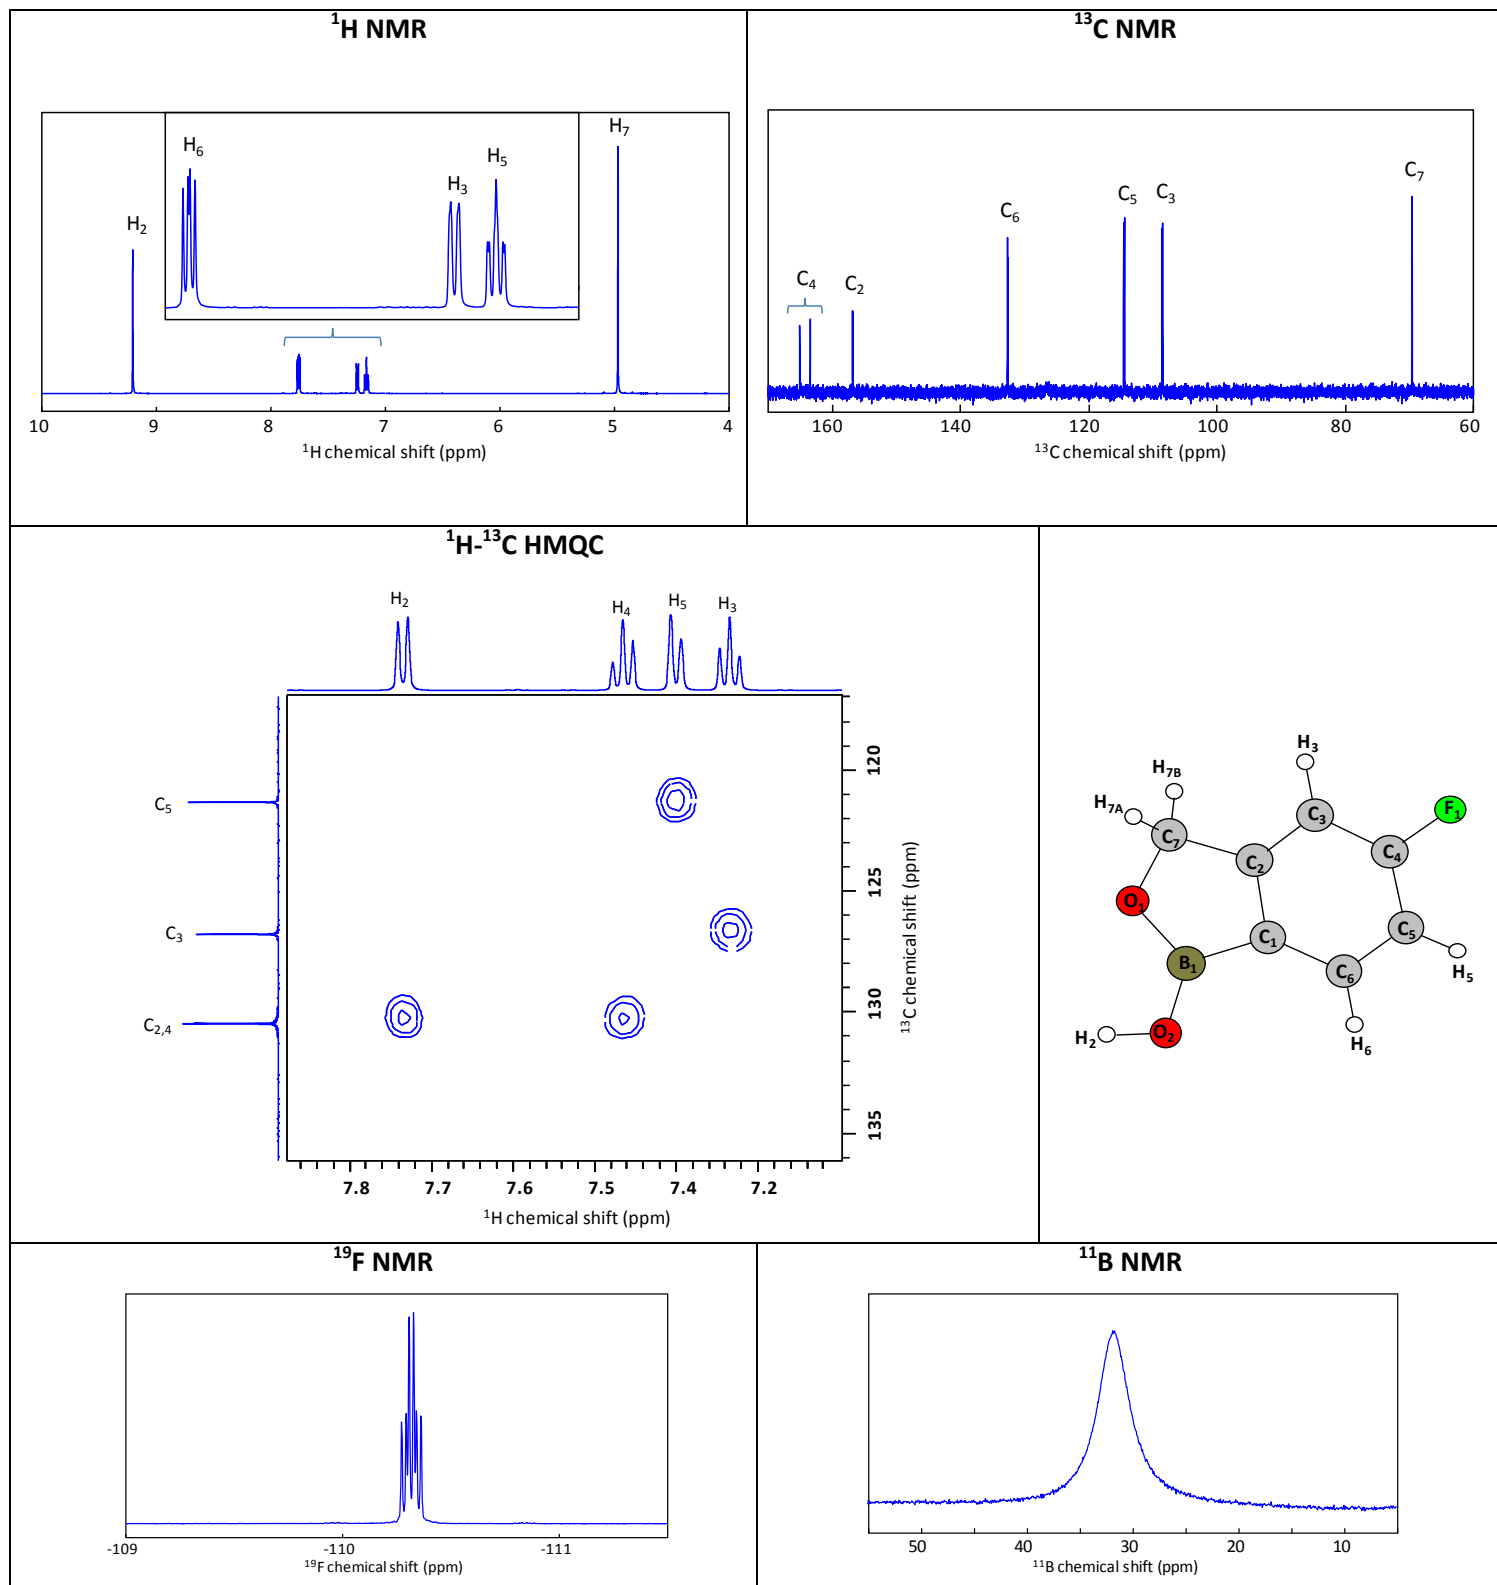

**Table S1.** Peak assignments and J couplings measured on the  $^1\text{H}$ ,  $^{13}\text{C}$  and  $^{19}\text{F}$  NMR spectra of AN2690, shown in Figure S2 (recorded in  $\text{DMSO-d}^6$ ).

| $^1\text{H}$ NMR |                |                                                                                   | $^{13}\text{C}$ NMR |                |                                     | $^{19}\text{F}$ NMR |                |                                                                          |
|------------------|----------------|-----------------------------------------------------------------------------------|---------------------|----------------|-------------------------------------|---------------------|----------------|--------------------------------------------------------------------------|
| H                | $\delta$ (ppm) | Multiplicity<br>J coupling                                                        | C                   | $\delta$ (ppm) | Multiplicity<br>J coupling          | F                   | $\delta$ (ppm) | Multiplicity<br>J coupling                                               |
| -                | -              | -                                                                                 | C <sub>1</sub>      | -              | -                                   | -                   | -              | -                                                                        |
| H <sub>2</sub>   | 9.25           | s                                                                                 | C <sub>2</sub>      | 156.6          | d<br>$^3J_{\text{C..F}} = 8.9$ Hz   | -                   | -              | -                                                                        |
| H <sub>3</sub>   | 7.25           | dd<br>$^3J_{\text{H..F}} = 9.7$ Hz<br>$^4J_{\text{H..H}} = 3.2$ Hz                | C <sub>3</sub>      | 108.5          | d<br>$^2J_{\text{C..F}} = 22.1$ Hz  | -                   | -              | -                                                                        |
| -                | -              | -                                                                                 | C <sub>4</sub>      | 164.2          | d<br>$^1J_{\text{C..F}} = 246.4$ Hz | F <sub>1</sub>      | -110.3         | dt<br>$^3J_{\text{H..F}} \sim 9.6$ Hz<br>$^4J_{\text{H..F}} \sim 5.9$ Hz |
| H <sub>5</sub>   | 7.16           | $\sim$ dt<br>$^3J_{\text{H..F,H..H}} \sim 8.5$ Hz<br>$^4J_{\text{H..H}} = 3.2$ Hz | C <sub>5</sub>      | 114.4          | d<br>$^2J_{\text{C..F}} = 22.0$ Hz  | -                   | -              | -                                                                        |
| H <sub>6</sub>   | 7.75           | dd<br>$^3J_{\text{H..H}} = 8.7$ Hz<br>$^4J_{\text{H..F}} = 5.3$ Hz                | C <sub>6</sub>      | 132.6          | d<br>$^3J_{\text{C..F}} = 9.3$ Hz   | -                   | -              | -                                                                        |
| H <sub>7</sub>   | 4.97           | s                                                                                 | C <sub>7</sub>      | 69.5           | d<br>$^4J_{\text{C..F}} = 3.1$ Hz   | -                   | -              | -                                                                        |

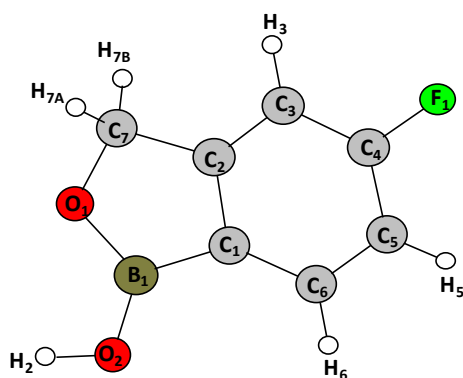

**Figure S3.**  $^1\text{H}$ ,  $^{13}\text{C}$  and  $^{11}\text{B}$  NMR spectra, and 2D  $^1\text{H}$ - $^{13}\text{C}$  HMQC spectrum of BBzx, recorded in DMSO- $d_6$ . (except for the  $^{11}\text{B}$  NMR spectrum, which was recorded in  $\text{D}_2\text{O}$ )

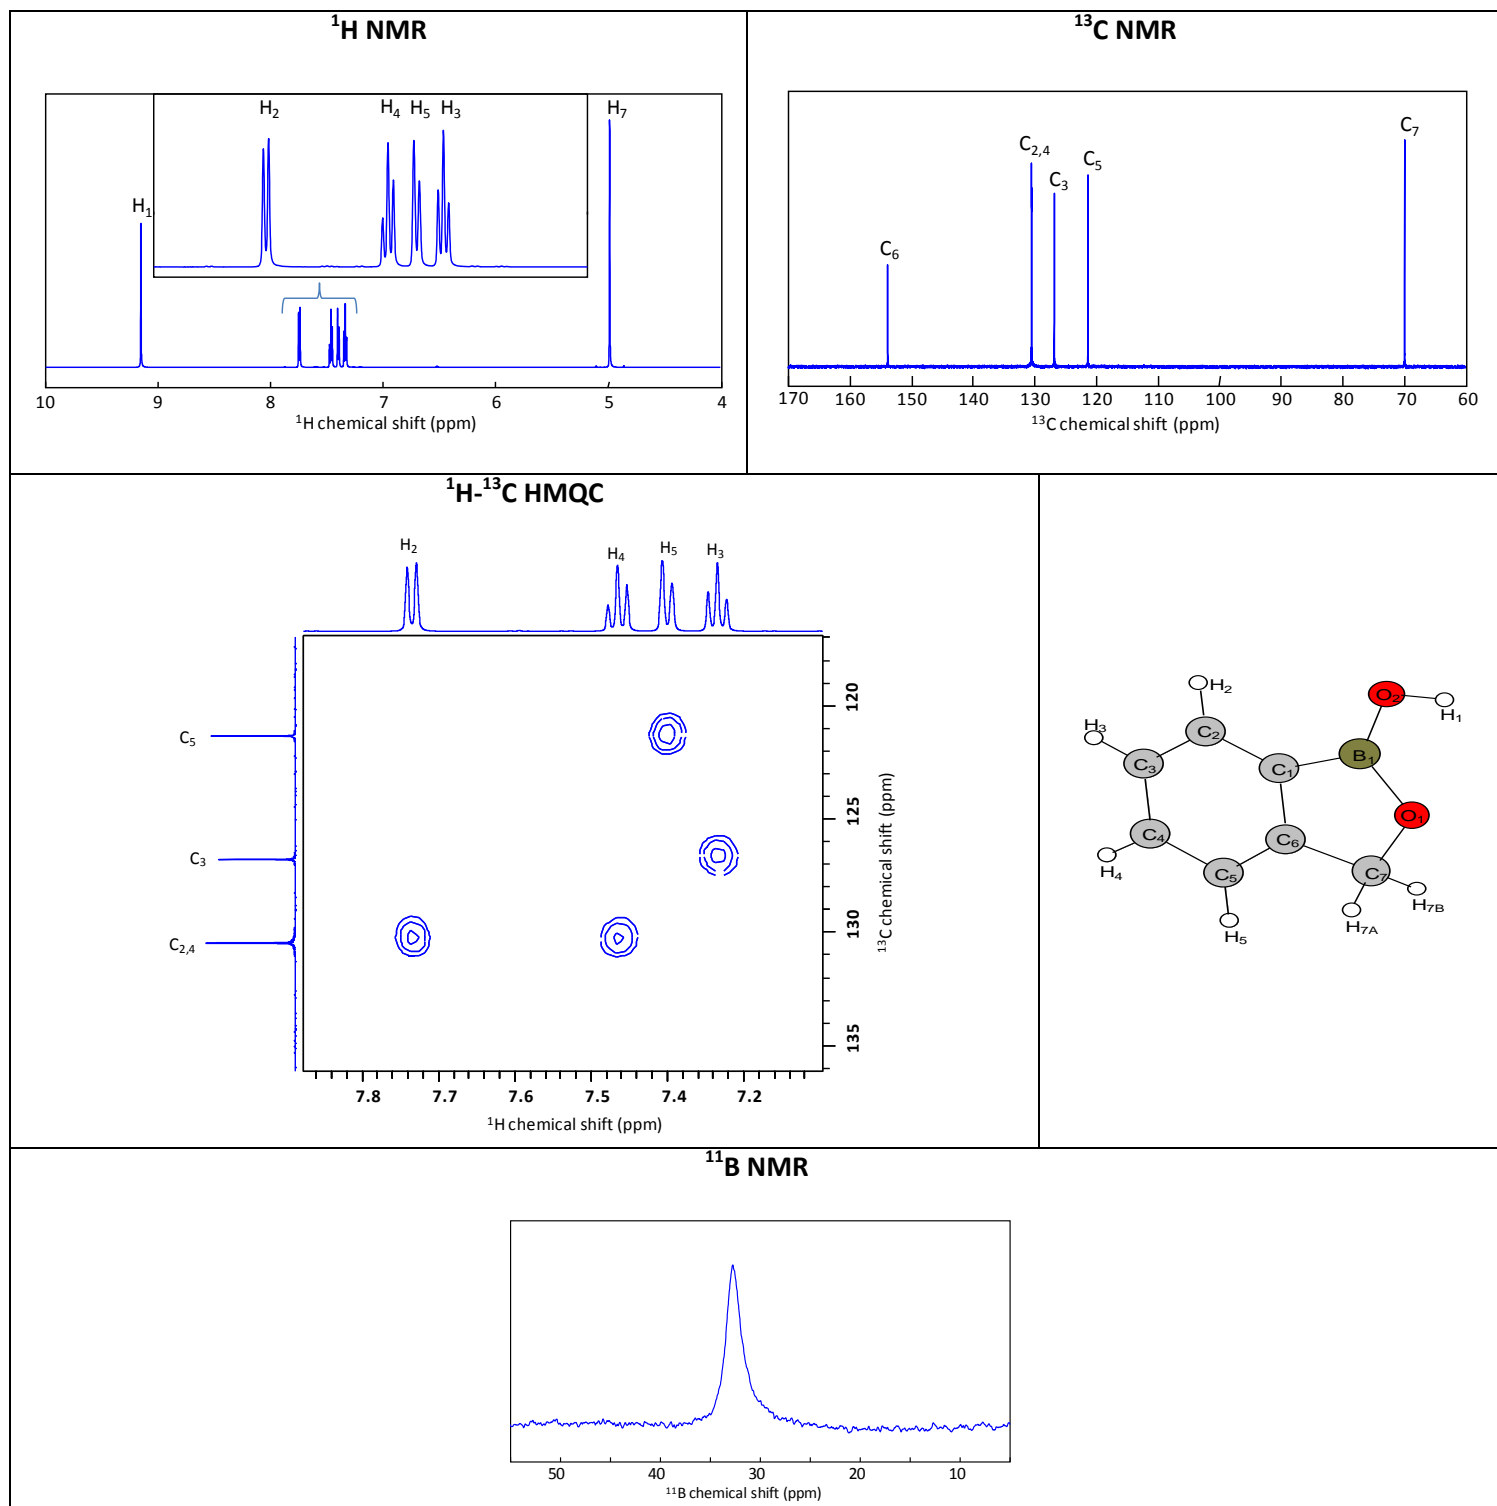

**Table S2.** Peak assignments and J couplings measured on the  $^1\text{H}$  and  $^{13}\text{C}$  NMR spectra of BBzx, shown in Figure S3 (recorded in  $\text{DMSO-d}^6$ ).

| $^1\text{H}$   |                |                                            | $^{13}\text{C}$ |                |
|----------------|----------------|--------------------------------------------|-----------------|----------------|
| H              | $\delta$ (ppm) | Multiplicity<br>$J_{\text{H..H}}$ coupling | C               | $\delta$ (ppm) |
| H <sub>1</sub> | 9.15           | s                                          | C <sub>1</sub>  | -              |
| H <sub>2</sub> | 7.73           | d<br>$^3J_{\text{H..H}} = 7.3 \text{ Hz}$  | C <sub>2</sub>  | 130.5          |
| H <sub>3</sub> | 7.33           | t<br>$^3J_{\text{H..H}} = 7.3 \text{ Hz}$  | C <sub>3</sub>  | 126.8          |
| H <sub>4</sub> | 7.46           | t<br>$^3J_{\text{H..H}} = 7.4 \text{ Hz}$  | C <sub>4</sub>  | 130.5          |
| H <sub>5</sub> | 7.39           | d<br>$^3J_{\text{H..H}} = 7.6 \text{ Hz}$  | C <sub>5</sub>  | 121.3          |
|                | -              | -                                          | C <sub>6</sub>  | 153.9          |
| H <sub>7</sub> | 4.98           | s                                          | C <sub>7</sub>  | 69.9           |

**Figure S4.** TGA characterizations of BBzx and AN2690.

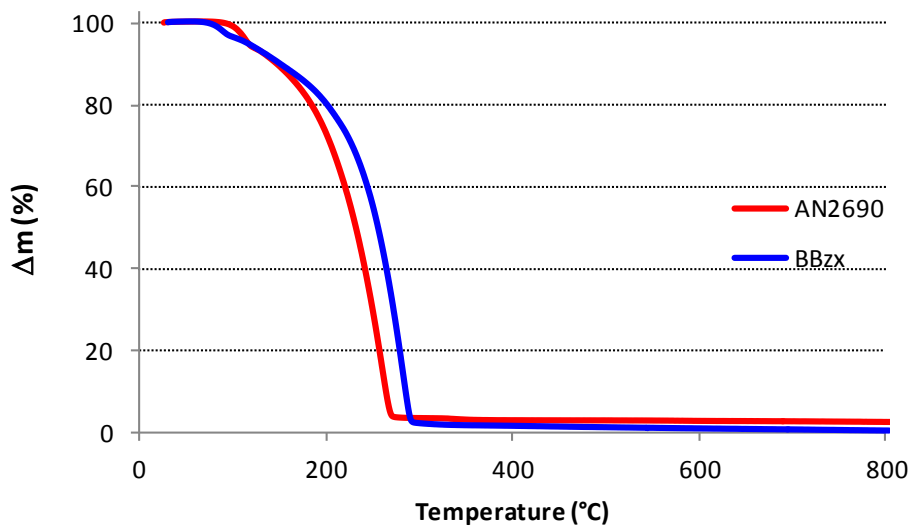

In the TGA conditions used here, the degradation starts at  $\sim 75$  °C for BBzx and  $\sim 90$  °C for AN2690. An inter-molecular dehydration most probably occurs in the initial stages of the weight loss. It should be noted that information on the thermal stability of BBzx and AN2690 is important, in order to avoid any degradation of these molecules during other syntheses of derived molecules or materials.



**Figure S5.** Comparison of the XRD powder patterns of AN2690 and BBzx, to those simulated for previously published crystal structures of these two molecules.

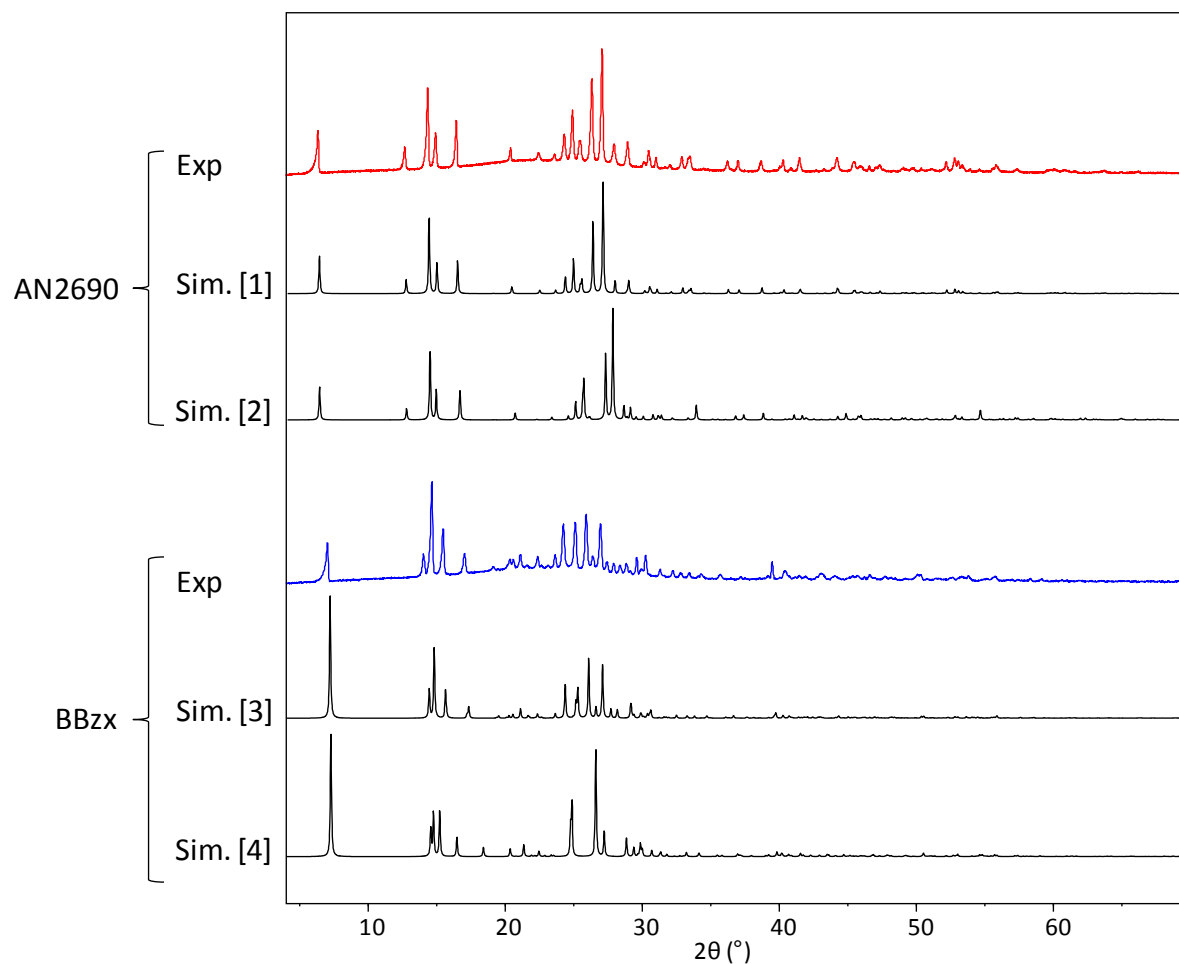

[1] Structure recorded as part of this work (CCDC 986106).

[2] I. D. Madura, A. Adamczyk-Wozniak, M. Jakubczyk and A. Sporzynski, *Acta Cryst.* 2011, **67**, 414.

[3] V. V. Zhdankin, P. J. Persichini III, L. Zhang, S. Fix and P. Kiprof, *Tetrahedron Lett.* 1999, **40**, 6705. (polymorph characterized in this manuscript – referred to as P(1)).

[4] A. Adamczyk-Wozniak, M. K. Cyranski, M. Jakubczyk, P. Klimentowska, A. Koll, J. Kołodziejczak, G. Pojmaj, A. Zubrowska, G. Z. Zukowska and A. Sporzynski, *J. Phys. Chem. A*, 2010, **114**, 2324 (polymorph referred to as P(2)).

**Table S3.** Comparison of the *single-crystal* X-ray data of structures of AN2690 and BBzx.

| Phase                        | AN2690<br>(C <sub>7</sub> H <sub>6</sub> BO <sub>2</sub> F) |             | BBzx<br>(C <sub>7</sub> H <sub>7</sub> BO <sub>2</sub> ) |                         |
|------------------------------|-------------------------------------------------------------|-------------|----------------------------------------------------------|-------------------------|
|                              | [1]                                                         | [2]         | [3,4]                                                    | [5]                     |
| Reference                    | [1]                                                         | [2]         | [3,4]                                                    | [5]                     |
| CCDC<br>(or CSD)             | 986106                                                      | 811360      | LOQQEN                                                   | 744739<br>LOQQEN01      |
| Crystal System               | Triclinic                                                   | Triclinic   | Triclinic                                                | Monoclinic              |
| Space Group                  | <i>P</i> -1                                                 | <i>P</i> -1 | <i>P</i> -1                                              | <i>P</i> 2 <sub>1</sub> |
| <i>a</i> (Å)                 | 4.0277(2)                                                   | 3.8799(3)   | 4.5250(6)                                                | 4.5355(7)               |
| <i>b</i> (Å)                 | 6.3237(6)                                                   | 6.3077(5)   | 6.1615(7)                                                | 24.292(4)               |
| <i>c</i> (Å)                 | 14.0649(14)                                                 | 14.0735(12) | 24.640(3)                                                | 6.1436(5)               |
| $\alpha$ (°)                 | 97.11(1)                                                    | 98.07(1)    | 96.226(2)                                                | 90                      |
| $\beta$ (°)                  | 91.01(1)                                                    | 91.56(1)    | 90.799(2)                                                | 102.73(1)               |
| $\gamma$ (°)                 | 100.63(1)                                                   | 100.47(1)   | 102.652(2)                                               | 90                      |
| <i>V</i> (Å <sup>3</sup> )   | 349.07(5)                                                   | 334.84(5)   | 665.84(38)                                               | 660.23(135)             |
| <i>Z</i>                     | 2                                                           | 2           | 4                                                        | 4                       |
| Density (g/cm <sup>3</sup> ) | 1.445                                                       | 1.507       | 1.336                                                    | 1.347                   |
| Measurement Temperature (K)  | 293                                                         | 100         | 173                                                      | 100                     |

[1] This work.

[2] I. D. Madura, A. Adamczyk-Wozniak, M. Jakubczyk and A. Sporzynski, *Acta Cryst.* 2011, **67**, 414.

[3] V. V. Zhdankin, P. J. Persichini III, L. Zhang, S. Fix and P. Kiprof, *Tetrahedron Lett.* 1999, **40**, 6705. (polymorph referred to as P(1) – corresponds to the one characterized in this manuscript).

[4] For the BBzx phase we studied here, the lattice parameters determined after Le Bail refinement of the XRD powder pattern (recorded at room temperature – see Figure S1) were the following:  $a = 4.4567(19)$  Å,  $b = 6.155(3)$  Å,  $c = 25.028(10)$  Å,  $\alpha = 96.345(4)^\circ$ ,  $\beta = 90.783(3)^\circ$ ,  $\gamma = 102.434(4)^\circ$ .

[5] A. Adamczyk-Wozniak, M. K. Cyranski, M. Jakubczyk, P. Klimientowska, A. Koll, J. Kołodziejczak, G. Pojmaj, A. Zubrowska, G. Z. Zukowska and A. Sporzynski, *J. Phys. Chem. A*, 2010, **114**, 2324. (polymorph referred to as P(2)).

**Figure S6.** Comparison of the single-crystal structures of AN2690.

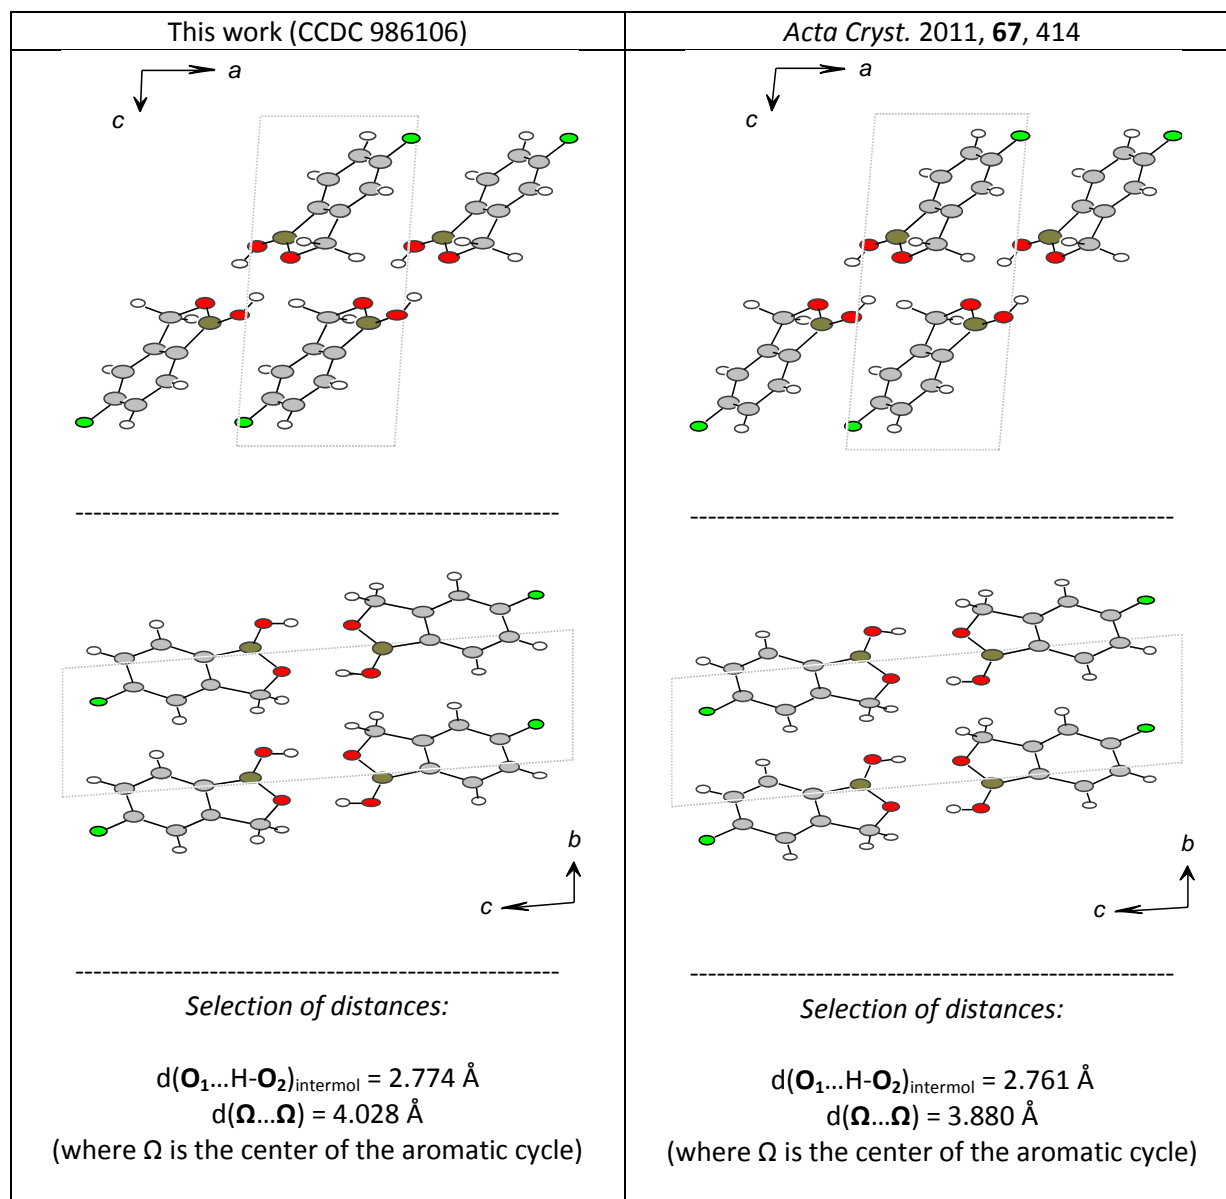

**Figure S7.** Hirshfeld surface fingerprint plots<sup>3</sup> of the two single crystal structures of AN2690.

Previous studies in the literature have shown that these fingerprint plots can be used as a tool to discuss cases of polymorphism in molecular crystals.

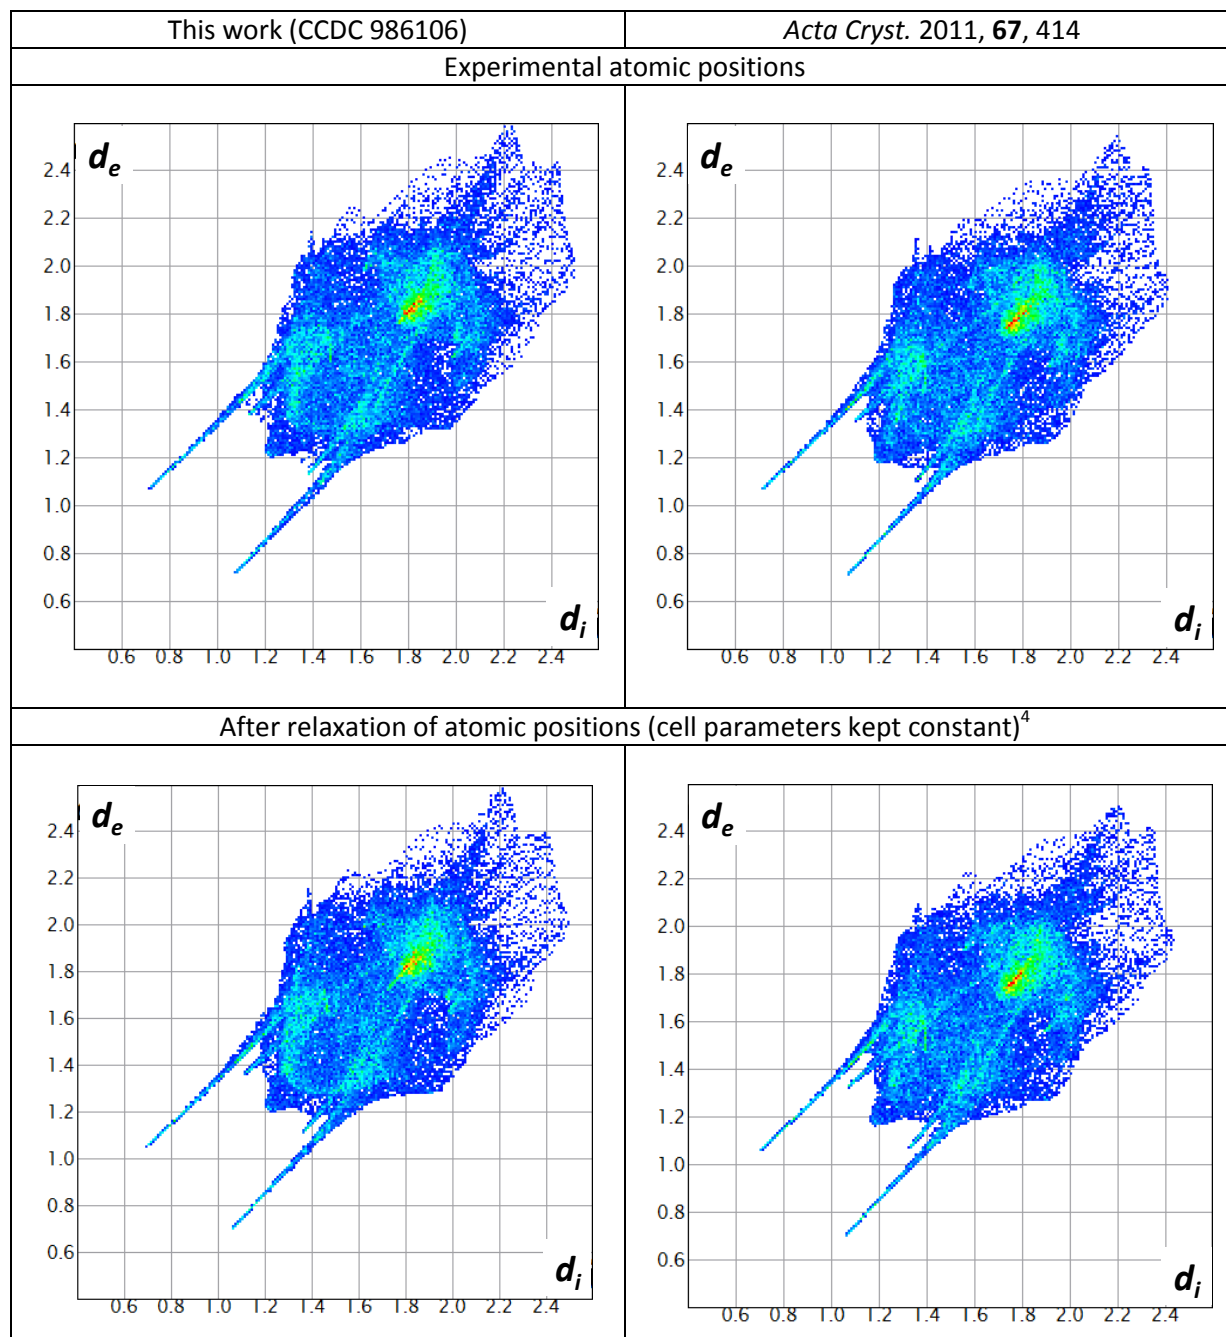

<sup>3</sup> The « CrystalExplorer » software was used: CrystalExplorer (Version 3.1), S. K. Wolff, D. J. Grimwood, J. J. McKinnon, M. J. Turner, D. Jayatilaka and M. A. Spackman, University of Western Australia, 2012.

<sup>4</sup> Relaxations in Crystal09 (B3LYP-D\*; BS-A – see experimental section).

**Figure S8.** Comparison of the single-crystal structures of BBzx.

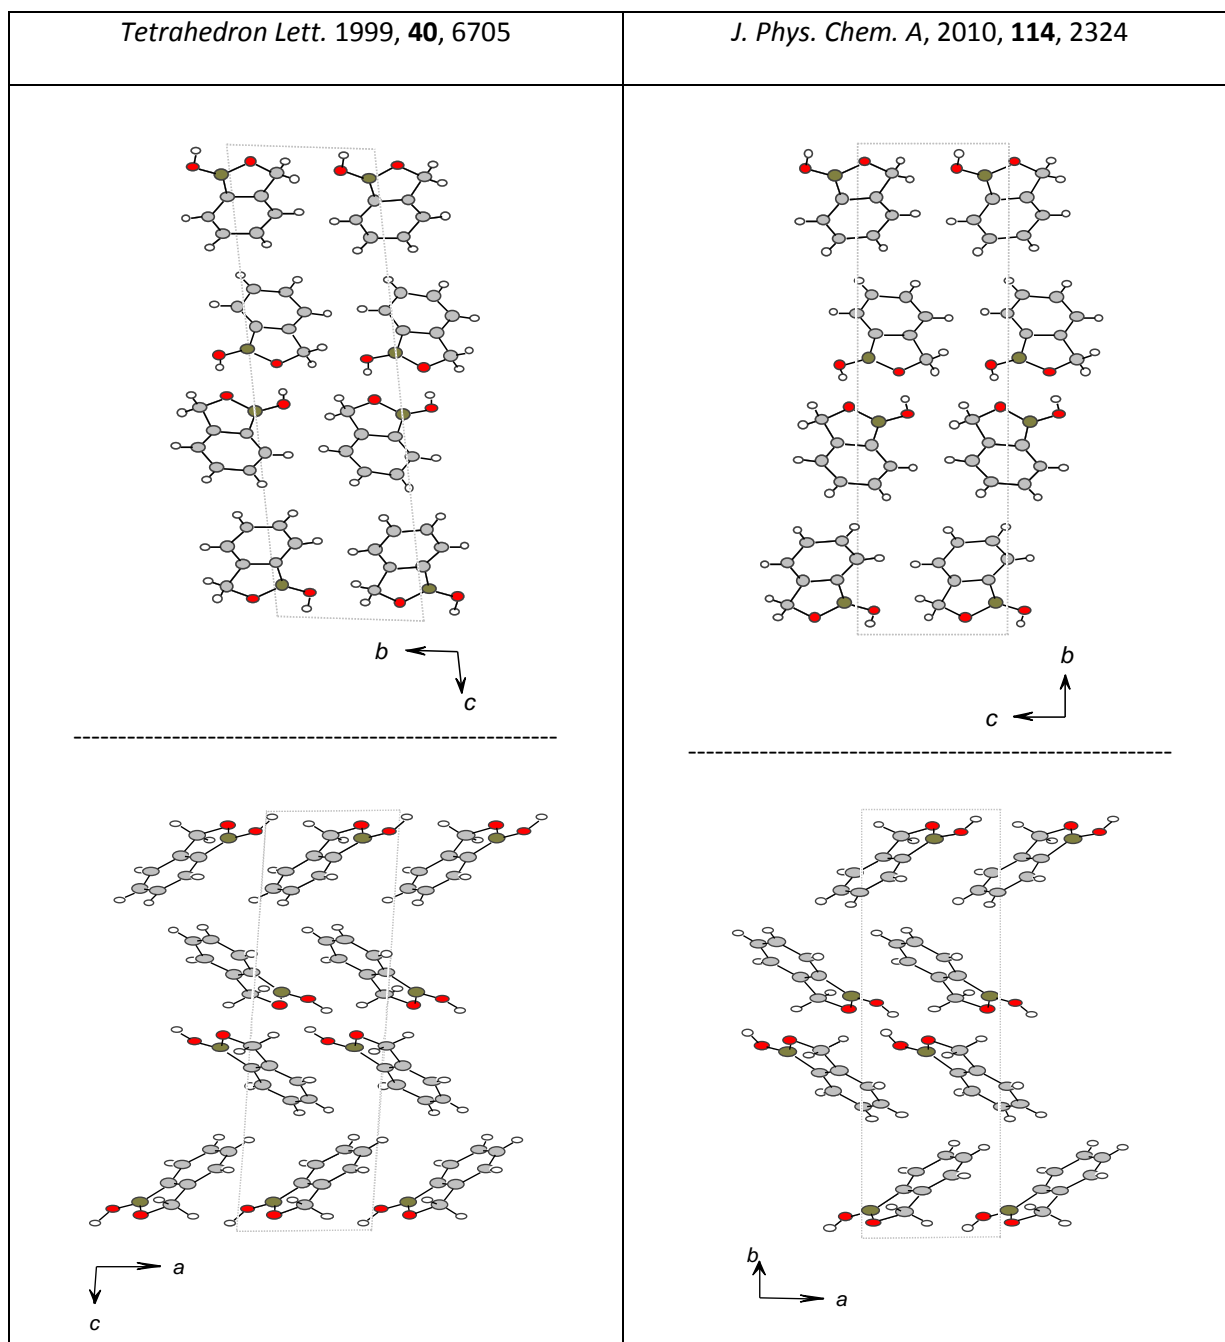

**Table S4.** Comparison of geometrical parameters in a molecular dimer of AN2690 (after DFT-relaxation), and in the two crystal structures reported so far.

|                  | Optimized geometry<br>(Gaussian 09) | Expt<br>(this work – CCDC 986106) | Expt<br>( <i>Acta Cryst.</i> 2011, <b>67</b> , 414) |
|------------------|-------------------------------------|-----------------------------------|-----------------------------------------------------|
| Distances (in Å) |                                     |                                   |                                                     |
| B1-O1            | 1.403                               | 1.388                             | 1.392                                               |
| B1-O2            | 1.343                               | 1.344                             | 1.348                                               |
| O1-C7            | 1.443                               | 1.446                             | 1.447                                               |
| C7-C2            | 1.509                               | 1.500                             | 1.503                                               |
| C2-C1            | 1.402                               | 1.393                             | 1.395                                               |
| C1-B1            | 1.553                               | 1.547                             | 1.552                                               |
| C1-C6            | 1.398                               | 1.397                             | 1.401                                               |
| C6-C5            | 1.392                               | 1.378                             | 1.386                                               |
| C5-C4            | 1.392                               | 1.377                             | 1.383                                               |
| C4-F1            | 1.355                               | 1.356                             | 1.356                                               |
| C4-C3            | 1.387                               | 1.372                             | 1.382                                               |
| C3-C2            | 1.392                               | 1.382                             | 1.390                                               |
| O1...(H2)-O2     | 2.790                               | 2.774                             | 2.761                                               |
| Angles (in °)    |                                     |                                   |                                                     |
| O1-B1-O2         | 122.7                               | 121.6                             | 121.5                                               |
| O1-B1-C1         | 107.5                               | 108.2                             | 108.2                                               |
| B1-C1-C2         | 105.7                               | 105.2                             | 104.9                                               |
| C1-C2-C7         | 110.3                               | 110.6                             | 110.9                                               |
| C2-C7-O1         | 105.6                               | 105.5                             | 105.5                                               |
| B1-O1...(H2)-O2  | 124.5                               | 126.2                             | 126.4                                               |

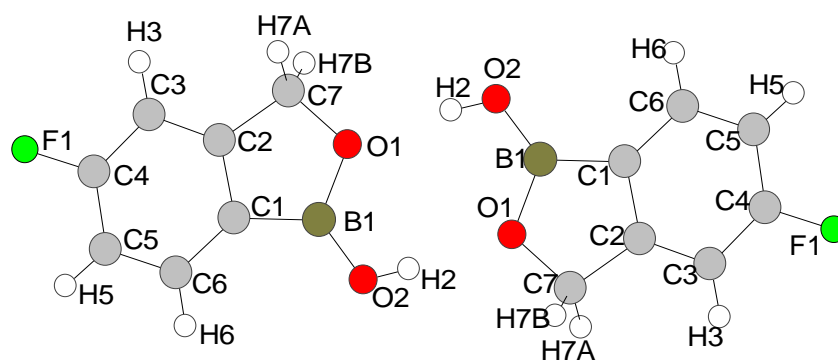

**Table S5:** Vibration frequencies (related intensities), and PED analysis of a dimer of AN2690, after geometry optimization (using the B3LYP/6-311++G(d,p) method, as implemented in Gaussian09).

| Calculated Frequency (cm <sup>-1</sup> ) | Calculated Intensity | Assignment and PED>10%                     |      |
|------------------------------------------|----------------------|--------------------------------------------|------|
| 3560                                     | 3155                 | v(OH) sym                                  | 100% |
| 3525                                     | 0                    | v(OH) antisym                              | 100% |
| 3201                                     | 0                    | v(CH) sym                                  | 90%  |
| 3201                                     | 8                    | v(CH) antisym                              | 90%  |
| 3187                                     | 0                    | v(CH) sym                                  | 99%  |
| 3187                                     | 7                    | v(CH) antisym                              | 99%  |
| 3177                                     | 10                   | v(CH) antisym                              | 89%  |
| 3177                                     | 1                    | v(CH) sym                                  | 89%  |
| 3073                                     | 23                   | v(CH)                                      | 97%  |
| 3073                                     | 0                    | v(CH)                                      | 97%  |
| 3038                                     | 0                    | v(CH)                                      | 99%  |
| 3038                                     | 55                   | v(CH)                                      | 99%  |
| 1650                                     | 0                    | v(CC)                                      | 36%  |
| 1650                                     | 281                  | v(CC)                                      | 36%  |
| 1620                                     | 88                   | v(CC)                                      | 30%  |
| 1620                                     | 0                    | v(CC)                                      | 30%  |
| 1523                                     | 183                  | v(BO) antisym                              | 22%  |
| 1518                                     | 0                    |                                            | <10% |
| 1502                                     | 53                   | δ(HCH) exocyc rock                         | 44%  |
|                                          |                      | δ(HCH) exocyc scissor                      | 44%  |
| 1500                                     | 0                    | δ(HCH) exocyc rock                         | 47%  |
|                                          |                      | δ(HCH) exocyc scissor                      | 47%  |
| 1468                                     | 1010                 | v(BO) antisym                              | 39%  |
| 1464                                     | 0                    | v(BO) sym                                  | 43%  |
| 1453                                     | 0                    | v(CC) sym                                  | 24%  |
| 1452                                     | 31                   | v(CC) antisym                              | 24%  |
| 1390                                     | 187                  | δ(OCH) exocyc wag                          | 46%  |
| 1384                                     | 0                    | δ(OCH) exocyc wag                          | 49%  |
| 1334                                     | 0                    | v(CC) sym                                  | 18%  |
| 1334                                     | 7                    | v(CC) antisym                              | 18%  |
| 1292                                     | 127                  | δ(CCH) exocyc antisym                      | 20%  |
| 1288                                     | 0                    | δ(CCH) exocyc sym                          | 20%  |
| 1264                                     | 223                  | v(CF) antisym                              | 26%  |
| 1262                                     | 0                    | δ(HOB)                                     | 23%  |
| 1250                                     | 0                    | δ(HOB)                                     | 40%  |
| 1238                                     | 108                  | δ(HOB)                                     | 34%  |
| 1221                                     | 1                    | δ(OCH) exocyc twist                        | 68%  |
|                                          |                      | opla(CC) butterfly at junction             | 21%  |
| 1221                                     | 0                    | δ(OCH) exocyc twist                        | 68%  |
|                                          |                      | opla(CC) butterfly at junction             | 21%  |
| 1175                                     | 0                    | δ(CCH) exocyc                              | 19%  |
| 1163                                     | 39                   | δ(HOB)                                     | 22%  |
|                                          |                      | δ(CCH) exocyc                              | 23%  |
|                                          |                      | v(CC)                                      | 20%  |
| 1148                                     | 0                    | δ(CCH) exocyc                              | 35%  |
| 1148                                     | 15                   | δ(CCH) exocyc                              | 36%  |
| 1102                                     | 0                    | δ(CCH) exocyc                              | 23%  |
| 1099                                     | 110                  | δ(CCH) exocyc                              | 21%  |
|                                          |                      | δ(CCC) cyc: trig def (E')                  | 21%  |
| 1065                                     | 0                    | v(CO)                                      | 33%  |
|                                          |                      | v(OB)                                      | 24%  |
| 1057                                     | 62                   | v(CO)                                      | 45%  |
|                                          |                      | v(OB)                                      | 23%  |
| 1022                                     | 0                    | τ(BCCC) and/or τ(COBC) cyc: ring tors (E') | 11%  |
|                                          |                      | opla(CC) butterfly at junction             | 65%  |
| 1022                                     | 0                    | τ(BCCC) cyc: ring tors (E')                | 11%  |
|                                          |                      | opla(CC) butterfly at junction             | 65%  |
| 988                                      | 474                  | v(CO)                                      | 35%  |
| 986                                      | 0                    | v(CO)                                      | 41%  |
| 976                                      | 0                    | δ(CCC) cyc: puckering                      | 16%  |
|                                          |                      | τ(CCCC) cyc: ring pucker                   | 15%  |
|                                          |                      | opla(CC) butterfly at junction             | 39%  |
| 976                                      | 0                    | δ(CCC) cyc: puckering                      | 15%  |
|                                          |                      | τ(CCCC) cyc: ring pucker                   | 16%  |
|                                          |                      | opla(CC) butterfly at junction             | 39%  |
| 950                                      | 80                   | v(CF) antisym                              | 16%  |
|                                          |                      | v(CC) antisym                              | 17%  |
| 950                                      | 0                    | v(CF) sym                                  | 16%  |
|                                          |                      | v(CC) sym                                  | 16%  |
| 874                                      | 64                   | opla(CH) exocyc                            | 12%  |
|                                          |                      | opla(CH)                                   | 11%  |
|                                          |                      | δ(CCC) cyc: puckering and asym torsion     | 32%  |
|                                          |                      | τ(CCCC) cyc: ring pucker and asym torsion  | 32%  |

|     |     |                                                                                                                                                                                                                                                                                                          |                          |
|-----|-----|----------------------------------------------------------------------------------------------------------------------------------------------------------------------------------------------------------------------------------------------------------------------------------------------------------|--------------------------|
| 874 | 0   | opla(CH) exocyc<br>opla(CH)<br>$\delta(\text{CCC})$ cyc: puckering and asym torsion<br>$\tau(\text{CCCC})$ cyc: ring pucker and asym torsion                                                                                                                                                             | 12%<br>12%<br>32%<br>32% |
| 844 | 0   | $\delta(\text{CCC})$ cyc: asym torsion<br>$\tau(\text{CCCC})$ cyc: asym torsion<br>opla(CC) butterfly at junction                                                                                                                                                                                        | 11%<br>10%<br>57%        |
| 844 | 38  | $\delta(\text{CCC})$ cyc: asym torsion<br>$\tau(\text{CCCC})$ cyc: asym torsion<br>opla(CC) butterfly at junction                                                                                                                                                                                        | 10%<br>11%<br>57%        |
| 815 | 194 | $\tau(\text{HOBC})$                                                                                                                                                                                                                                                                                      | 80%                      |
| 775 | 17  |                                                                                                                                                                                                                                                                                                          | <10%                     |
| 775 | 0   |                                                                                                                                                                                                                                                                                                          | <10%                     |
| 771 | 0   | opla(CC) butterfly at junction                                                                                                                                                                                                                                                                           | 58%                      |
| 750 | 9   | opla(CC) butterfly at junction                                                                                                                                                                                                                                                                           | 69%                      |
| 748 | 0   | opla(CC) butterfly at junction                                                                                                                                                                                                                                                                           | 68%                      |
| 727 | 0   | $\delta(\text{BOC})$ and/or $\delta(\text{CCC})$ cyc-5: ring def. (E'1)<br>$\delta(\text{BOC})$ and $\delta(\text{CCC})$ cyc-5: ring def. (E'1)                                                                                                                                                          | 14%<br>14%               |
| 727 | 34  | $\delta(\text{BOC})$ and/or $\delta(\text{CCC})$ cyc-5: ring def. (E'1)<br>$\delta(\text{BOC})$ and $\delta(\text{CCC})$ cyc-5: ring def. (E'1)                                                                                                                                                          | 14%<br>15%               |
| 652 | 5   | $\delta(\text{CCC})$ cyc: trig def (E')<br>$\delta(\text{B}_9\text{-O}_8\text{-C}_7)$ and/or $\delta(\text{C7-C3-C4})$ cyc-5: ring def. (E'1)<br>$\delta(\text{CCC})$ cyc: asym def (E')<br>$\delta(\text{BOC})$ and $\delta(\text{CCC})$ cyc-5: ring def. (E'1)                                         | 9%<br>9%<br>9%<br>9%     |
| 648 | 0   | $\delta(\text{CCC})$ cyc: puckering<br>$\tau(\text{CCCC})$ cyc: ring pucker                                                                                                                                                                                                                              | 25%<br>25%               |
| 647 | 45  | $\delta(\text{CCC})$ cyc: puckering<br>$\tau(\text{CCCC})$ cyc: ring pucker                                                                                                                                                                                                                              | 25%<br>25%               |
| 646 | 0   | $\delta(\text{CCC})$ cyc: trig def (E')<br>$\delta(\text{BOC})$ and/or $\delta(\text{CCC})$ cyc-5: ring def. (E'1)<br>$\delta(\text{CCC})$ cyc: asym def (E')<br>$\delta(\text{BOC})$ and $\delta(\text{CCC})$ cyc-5: ring def. (E'1)                                                                    | 10%<br>8%<br>10%<br>8%   |
| 555 | 13  | $\delta(\text{BOC})$ and/or $\delta(\text{CCC})$ cyc-5: ring def. (E'1)<br>$\delta(\text{CBO})$ and/or $\delta(\text{OCC})$ cyc-5: ring def. (E'1)<br>$\delta(\text{BOC})$ and/or $\delta(\text{CCC})$ cyc-5: ring def. (E'1)<br>$\delta(\text{CBO})$ and/or $\delta(\text{OCC})$ cyc-5: ring def. (E'1) | 12%<br>17%<br>12%<br>17% |
| 550 | 0   | opla(CC) butterfly at junction                                                                                                                                                                                                                                                                           | 72%                      |
| 550 | 0   | opla(CC) butterfly at junction                                                                                                                                                                                                                                                                           | 72%                      |
| 546 | 0   | $\delta(\text{BOC})$ and/or $\delta(\text{CCC})$ cyc-5: ring def. (E'1)<br>$\delta(\text{CBO})$ and/or $\delta(\text{OCC})$ cyc-5: ring def. (E'1)<br>$\delta(\text{BOC})$ and/or $\delta(\text{CCC})$ cyc-5: ring def. (E'1)<br>$\delta(\text{CBO})$ and/or $\delta(\text{OCC})$ cyc-5: ring def. (E'1) | 14%<br>17%<br>14%<br>17% |
| 518 | 11  | $\delta(\text{OBO})$ exocyc<br>$\delta(\text{OBO})$<br>$\delta(\text{CCC})$ cyc: trig def (E')<br>$\delta(\text{CCC})$ cyc: asym def (E')                                                                                                                                                                | 21%<br>21%<br>15%<br>15% |
| 495 | 0   | $\delta(\text{OBO})$ exocyc<br>$\delta(\text{OBO})$<br>$\delta(\text{CCC})$ cyc: trig def (E')<br>$\delta(\text{CCC})$ cyc: asym def (E')                                                                                                                                                                | 19%<br>19%<br>13%<br>13% |
| 465 | 0   | $\delta(\text{CCF})$<br>$\delta(\text{CCF})$ exocyc<br>$\delta(\text{CCC})$ cyc: trig def (E')<br>$\delta(\text{CCC})$ cyc: asym def (E')                                                                                                                                                                | 11%<br>11%<br>15%<br>15% |
| 464 | 8   | $\delta(\text{CCF})$<br>$\delta(\text{CCF})$ exocyc<br>$\delta(\text{CCC})$ cyc: trig def (E')<br>$\delta(\text{CCC})$ cyc: asym def (E')                                                                                                                                                                | 14%<br>14%<br>17%<br>17% |
| 438 | 12  | $\delta(\text{CCC})$ cyc: asym torsion<br>$\tau(\text{CCCC})$ cyc: asym torsion                                                                                                                                                                                                                          | 35%<br>41%               |
| 438 | 0   | $\delta(\text{CCC})$ cyc: asym torsion<br>$\tau(\text{CCCC})$ cyc: asym torsion                                                                                                                                                                                                                          | 41%<br>35%               |

Frequency values below  $400\text{ cm}^{-1}$  are not reported, nor the PED contributions below 10%. The abbreviations in Table S5 are as follows :

|                                                               |                                                                                                                        |
|---------------------------------------------------------------|------------------------------------------------------------------------------------------------------------------------|
| $\nu(\text{XY})$ stretching of XY bond                        | $\delta(\text{XYZ})$ cyc: trig def (E') bending of the cycle using the trigonometric definition and E' symmetry        |
| $\delta(\text{XYZ})$ bending of XYZ                           | $\delta(\text{XYZ})$ cyc: puckering puckering bending of the cycle                                                     |
| $\tau(\text{AXYZ})$ torsion of AXYZ                           | $\delta(\text{XYZ})$ cyc: asym torsion asymmetric torsion of the cycle                                                 |
| $\delta(\text{XYZ})$ exocyc bending of the exocycle           | $\delta(\text{XYZ})$ cyc: ring def, (E') bending of the cycle using the trigonometric definition and ring E' symmetry  |
| opla(XY) exocyc out-of-plane of the exocycle                  | $\delta(\text{XYZ})$ cyc: trig def (E') bending of the cycle using the trigonometric definition and E' symmetry        |
| $\delta(\text{AXA})$ exocyc rock rocking of the exocycle      | $\tau(\text{AXYZ})$ cyc: ring tors (E'') torsion of the cycle using the trigonometric definition and ring E'' symmetry |
| $\delta(\text{XYZ})$ exocyc twist twisting of the exocycle    | $\tau(\text{AXYZ})$ cyc: ring pucker puckering torsion of the ring                                                     |
| opla(XA) out-of plane of XAYZ                                 | $\tau(\text{AXYZ})$ cyc: asym torsion asymmetric torsion of the cycle                                                  |
| $\delta(\text{XYZ})$ exocyc wag wagging of the exocycle       | opla(XY) butterfly at junction out-of-plane at the ring junction of XYZA                                               |
| $\delta(\text{AXA})$ exocyc scisso scissoring of the exocycle |                                                                                                                        |

where A, X, Y, and Z are atoms. Sym = symmetric, asym = asymmetric.



**Table S6:** Vibration frequencies (and related intensities), calculated for a dimer model of BBzx, after geometry optimization (using the B3LYP/6-311++G(d,p) method, as implemented in Gaussian09).

Frequency values below 400  $\text{cm}^{-1}$  are not reported.

| Calculated Frequency ( $\text{cm}^{-1}$ ) | Calculated Intensity ( $\text{cm}^{-1}$ ) | Calculated Frequency ( $\text{cm}^{-1}$ ) | Calculated Intensity ( $\text{cm}^{-1}$ ) |
|-------------------------------------------|-------------------------------------------|-------------------------------------------|-------------------------------------------|
| 3556                                      | 3156                                      | 1165                                      | 49                                        |
| 3521                                      | 0                                         | 1106                                      | 0                                         |
| 3186                                      | 4                                         | 1104                                      | 41                                        |
| 3186                                      | 45                                        | 1065                                      | 0                                         |
| 3175                                      | 24                                        | 1054                                      | 60                                        |
| 3174                                      | 20                                        | 1044                                      | 1                                         |
| 3165                                      | 1                                         | 1044                                      | 0                                         |
| 3165                                      | 3                                         | 1024                                      | 0                                         |
| 3156                                      | 4                                         | 1024                                      | 0                                         |
| 3156                                      | 5                                         | 1004                                      | 0                                         |
| 3070                                      | 27                                        | 1004                                      | 0                                         |
| 3070                                      | 0                                         | 986                                       | 488                                       |
| 3035                                      | 0                                         | 984                                       | 0                                         |
| 3035                                      | 60                                        | 966                                       | 1                                         |
| 1649                                      | 0                                         | 966                                       | 0                                         |
| 1648                                      | 78                                        | 887                                       | 0                                         |
| 1612                                      | 0                                         | 887                                       | 0                                         |
| 1612                                      | 5                                         | 846                                       | 2                                         |
| 1513                                      | 470                                       | 845                                       | 0                                         |
| 1507                                      | 0                                         | 820                                       | 215                                       |
| 1501                                      | 0                                         | 781                                       | 0                                         |
| 1501                                      | 20                                        | 778                                       | 30                                        |
| 1487                                      | 60                                        | 770                                       | 0                                         |
| 1486                                      | 0                                         | 740                                       | 83                                        |
| 1463                                      | 629                                       | 739                                       | 0                                         |
| 1461                                      | 0                                         | 736                                       | 0                                         |
| 1392                                      | 150                                       | 736                                       | 6                                         |
| 1388                                      | 0                                         | 677                                       | 12                                        |
| 1331                                      | 0                                         | 673                                       | 0                                         |
| 1331                                      | 10                                        | 650                                       | 0                                         |
| 1317                                      | 112                                       | 649                                       | 29                                        |
| 1310                                      | 0                                         | 553                                       | 1                                         |
| 1256                                      | 0                                         | 539                                       | 14                                        |
| 1245                                      | 114                                       | 538                                       | 0                                         |
| 1219                                      | 1                                         | 528                                       | 0                                         |
| 1219                                      | 0                                         | 474                                       | 0                                         |
| 1218                                      | 3                                         | 474                                       | 12                                        |
| 1217                                      | 0                                         | 465                                       | 1                                         |
| 1187                                      | 0                                         | 459                                       | 0                                         |
| 1183                                      | 0                                         | 418                                       | 0                                         |
| 1175                                      | 0                                         | 418                                       | 4                                         |

**Figure S9.** Comparison between experimental and calculated  $^1\text{H}$  NMR spectra of AN2690 and BBzx. Experimental solid state NMR data are shown in blue, and calculated  $^1\text{H}$  chemical shifts as vertical red bars. Calculated values correspond to the VASP-relaxed periodic model of the structure.

**a/ AN2690**

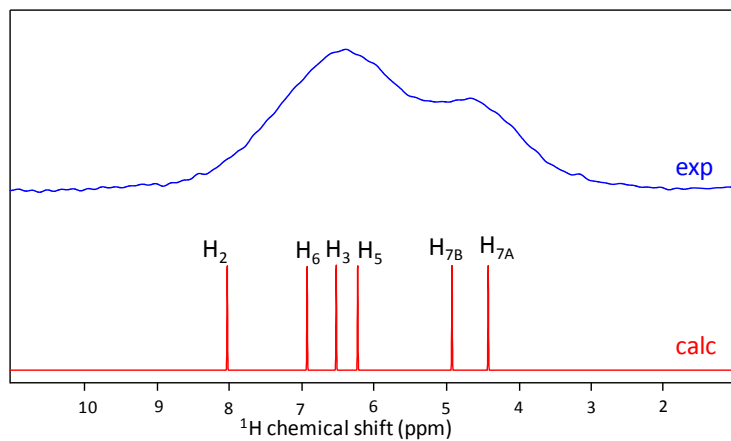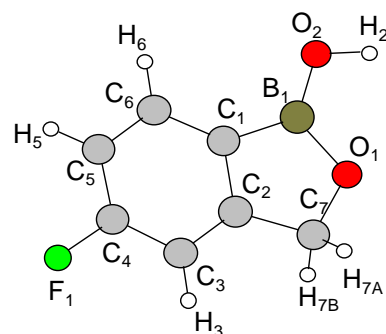

**b/ BBzx**

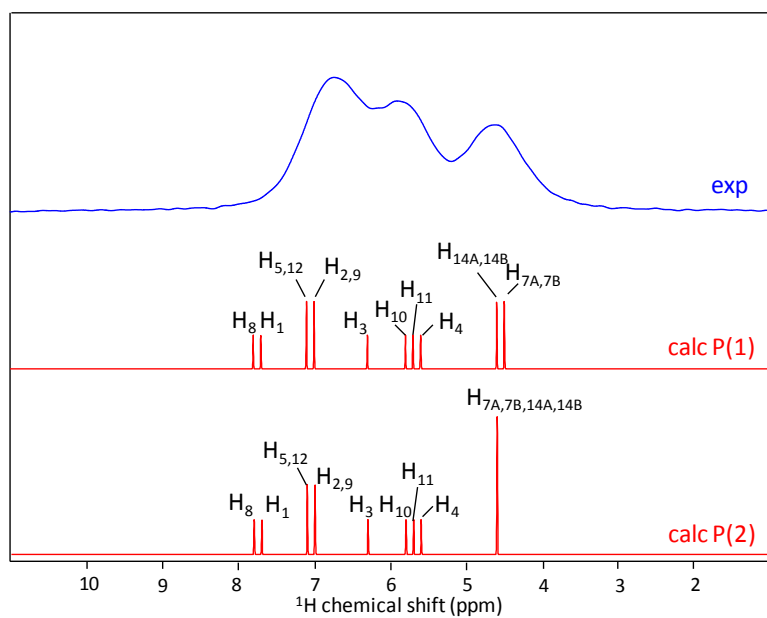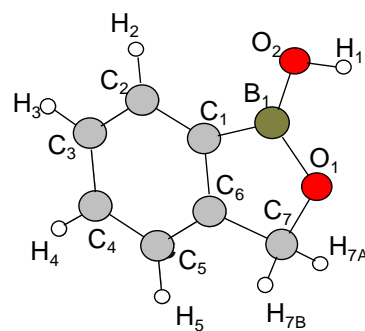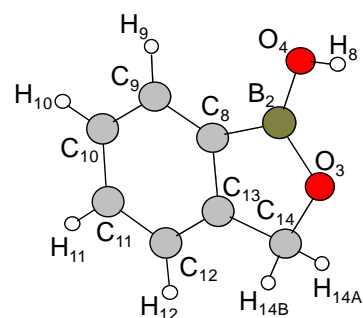

**Figure S10.** Comparison between experimental and calculated  $^{13}\text{C}$  NMR spectra of AN2690 and BBzx. Experimental solid state NMR data are shown in blue, solution NMR data in black, and calculated  $^{13}\text{C}$  chemical shifts as vertical red bars. Calculated values correspond to the VASP-relaxed periodic model of the structure.

**a/ AN2690**

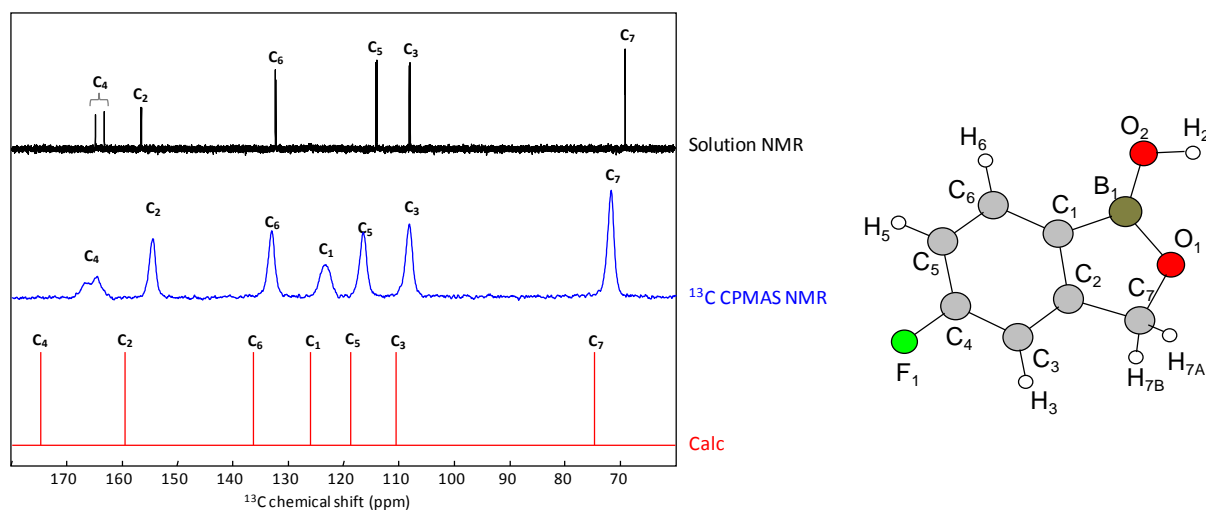

**b/ BBzx**

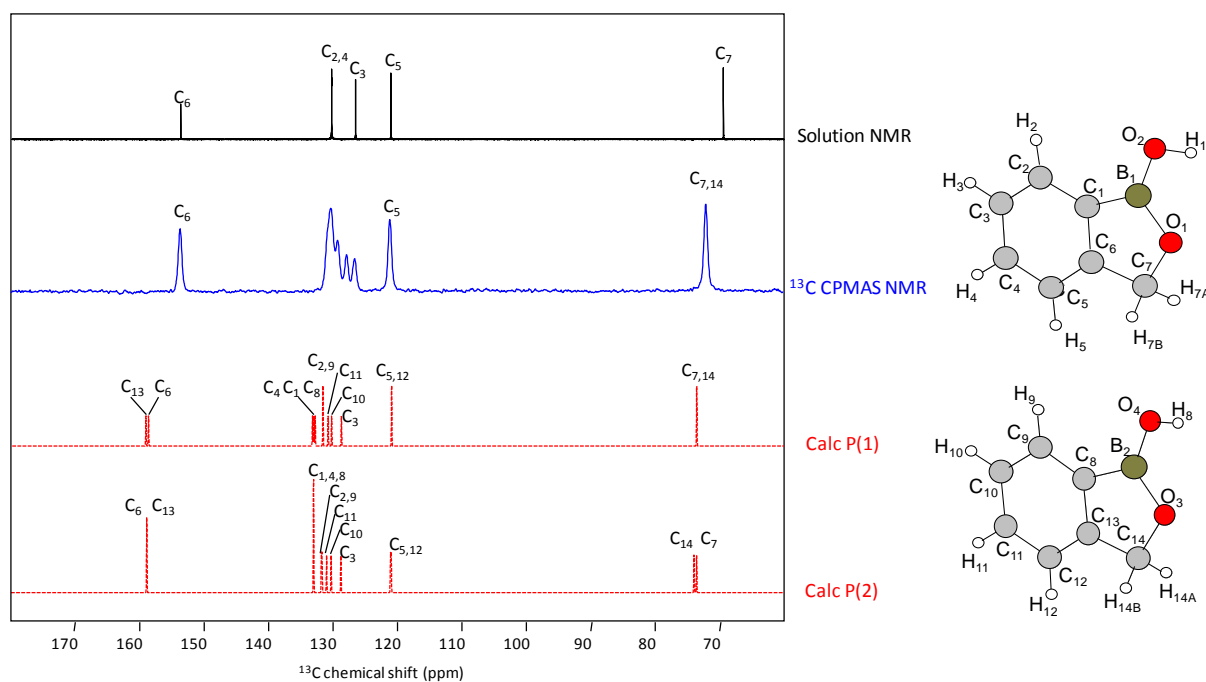

**Table S7.** GIPAW-calculated  $^1\text{H}$ ,  $^{13}\text{C}$ ,  $^{11}\text{B}$ ,  $^{19}\text{F}$  and  $^{17}\text{O}$  NMR parameters for different periodic models of the AN2690 structure.  $\delta_{\text{iso}}$  values are in ppm, and  $C_Q$  values in MHz.

|                                      |                 | Exp    | Calc<br>(for model obtained<br>after VASP<br>relaxation) |        | Calc<br>(for model obtained<br>after Crystal09<br>relaxation<br>(B3LYP-D*; BS-A)) |        | Calc<br>(for model obtained<br>after QE relaxation) |        |
|--------------------------------------|-----------------|--------|----------------------------------------------------------|--------|-----------------------------------------------------------------------------------|--------|-----------------------------------------------------|--------|
| AN2690 structure                     |                 | [1]    | [2]                                                      | [1]    | [2]                                                                               | [1]    | [2]                                                 | [1]    |
| $\delta_{\text{iso}}(^1\text{H})$    | H <sub>2</sub>  | 5 to 8 | 8.2                                                      | 8.0    | 8.2                                                                               | 8.2    | 8.9                                                 | 8.8    |
|                                      | H <sub>3</sub>  |        | 6.5                                                      | 6.5    | 6.7                                                                               | 6.8    | 6.6                                                 | 6.6    |
|                                      | H <sub>5</sub>  | 5 to 8 | 6.2                                                      | 6.2    | 6.4                                                                               | 6.2    | 6.3                                                 | 6.4    |
|                                      | H <sub>6</sub>  |        | 6.9                                                      | 6.9    | 6.9                                                                               | 6.4    | 6.9                                                 | 6.9    |
|                                      | H <sub>7A</sub> | 4 to 5 | 4.3                                                      | 4.4    | 5.1                                                                               | 4.4    | 4.5                                                 | 4.5    |
|                                      | H <sub>7B</sub> |        | 4.9                                                      | 4.9    | 5.3                                                                               | 4.9    | 5.1                                                 | 5.1    |
| $\delta_{\text{iso}}(^{13}\text{C})$ | C <sub>1</sub>  | 123.6  | 125.7                                                    | 126.1  | 127.2                                                                             | 126.5  | 127.1                                               | 127.3  |
|                                      | C <sub>2</sub>  | 154.6  | 159.8                                                    | 159.7  | 161.4                                                                             | 159.8  | 159.7                                               | 160.0  |
|                                      | C <sub>3</sub>  | 108.3  | 111.2                                                    | 110.6  | 111.7                                                                             | 110.4  | 111.8                                               | 111.2  |
|                                      | C <sub>4</sub>  | 165.7  | 174.3                                                    | 174.8  | 174.8                                                                             | 174.3  | 176.2                                               | 176.6  |
|                                      | C <sub>5</sub>  | 116.6  | 119.4                                                    | 118.9  | 119.3                                                                             | 118.9  | 120.2                                               | 119.8  |
|                                      | C <sub>6</sub>  | 133.2  | 136.7                                                    | 136.4  | 135.9                                                                             | 135.9  | 137.4                                               | 137.0  |
|                                      | C <sub>7</sub>  | 71.8   | 74.5                                                     | 74.9   | 78.5                                                                              | 74.9   | 77.7                                                | 77.6   |
| $\delta_{\text{iso}}(^{19}\text{F})$ | F <sub>1</sub>  | -108.6 | -108.7                                                   | -109.7 | -109.8                                                                            | -110.5 | -105.0                                              | -105.8 |
| $\delta_{\text{iso}}(^{11}\text{B})$ | B <sub>1</sub>  | 31.1   | 32.1                                                     | 32.3   | 32.6                                                                              | 32.0   | 32.0                                                | 32.1   |
| $C_Q(^{11}\text{B})^3$               |                 | 2.84   | 3.26                                                     | 3.26   | 3.22                                                                              | 3.24   | 3.26                                                | 3.26   |
| $\eta_Q(^{11}\text{B})$              |                 | 0.51   | 0.60                                                     | 0.59   | 0.60                                                                              | 0.57   | 0.59                                                | 0.59   |
| $\delta_{\text{iso}}(^{17}\text{O})$ | O <sub>1</sub>  | -      | 98.0                                                     | 98.6   | 100.2                                                                             | 97.6   | 103.0                                               | 103.0  |
|                                      | O <sub>2</sub>  | -      | 71.5                                                     | 68.7   | 70.8                                                                              | 67.5   | 76.1                                                | 73.7   |
| $C_Q(^{17}\text{O})$                 | O <sub>1</sub>  | -      | 8.68                                                     | 8.72   | 8.81                                                                              | 8.75   | 8.70                                                | 8.73   |
|                                      | O <sub>2</sub>  | -      | 6.61                                                     | 6.59   | 6.55                                                                              | 6.53   | 6.52                                                | 6.50   |
| $\eta_Q(^{17}\text{O})$              | O <sub>1</sub>  | -      | 0.42                                                     | 0.42   | 0.41                                                                              | 0.39   | 0.45                                                | 0.44   |
|                                      | O <sub>2</sub>  | -      | 0.27                                                     | 0.27   | 0.27                                                                              | 0.26   | 0.28                                                | 0.28   |

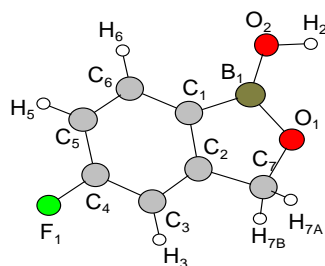

[1] This work (CCDC 986106).

[2] I. D. Madura, A. Adamczyk-Wozniak, M. Jakubczyk and A. Sporzynski, *Acta Cryst.* 2011, **67**, 414.

[3]  $C_Q$  values were calculated using  $Q(^{11}\text{B}) = 40.59$  mb.

**Table S8.** GIPAW-calculated  $^1\text{H}$ ,  $^{13}\text{C}$ ,  $^{11}\text{B}$ , and  $^{17}\text{O}$  NMR parameters for different periodic models of the BBzx structure.  $\delta_{\text{iso}}$  values are in ppm, and  $C_Q$  values in MHz.

|                                      |                                   | Exp               | Calc<br>(for model<br>obtained after<br>VASP relaxation) |                   |
|--------------------------------------|-----------------------------------|-------------------|----------------------------------------------------------|-------------------|
| BBzx Polymorph                       |                                   | P(1) <sup>1</sup> | P(1) <sup>1</sup>                                        | P(2) <sup>2</sup> |
| $\delta_{\text{iso}}(^1\text{H})$    | H <sub>1</sub><br>H <sub>8</sub>  | 6.3 to 8          | 7.7                                                      | 7.7               |
|                                      | H <sub>2</sub><br>H <sub>9</sub>  |                   | 7.8                                                      | 7.8               |
|                                      | H <sub>3</sub><br>H <sub>10</sub> | 5 to 6.3          | 7.0                                                      | 7.0               |
|                                      | H <sub>4</sub><br>H <sub>11</sub> |                   | 7.0                                                      | 7.0               |
|                                      | H <sub>5</sub><br>H <sub>12</sub> | 6.3 to 8          | 6.3                                                      | 6.3               |
|                                      | H <sub>6</sub><br>H <sub>14</sub> |                   | 5.8                                                      | 5.8               |
|                                      | H <sub>7</sub><br>H <sub>13</sub> | 4 to 5            | 5.6                                                      | 5.6               |
|                                      |                                   |                   | 5.7                                                      | 5.7               |
| $\delta_{\text{iso}}(^{13}\text{C})$ | C <sub>1</sub><br>C <sub>8</sub>  | ~130.3            | 132.9                                                    | 133.0             |
|                                      | C <sub>2</sub><br>C <sub>9</sub>  | ~130.3            | 133.1                                                    | 133.0             |
|                                      | C <sub>3</sub><br>C <sub>10</sub> | ~129.2            | 131.7                                                    | 131.8             |
|                                      | C <sub>4</sub><br>C <sub>11</sub> | ~129.2            | 131.7                                                    | 131.7             |
|                                      | C <sub>5</sub><br>C <sub>12</sub> | 126.6             | 128.8                                                    | 128.8             |
|                                      | C <sub>6</sub><br>C <sub>13</sub> | 127.8             | 130.3                                                    | 130.3             |
|                                      | C <sub>7</sub><br>C <sub>14</sub> | ~130.3            | 133.3                                                    | 133.0             |
|                                      |                                   | ~129.2            | 130.9                                                    | 131.0             |
|                                      |                                   | 121.1             | 121.0                                                    | 121.1             |
|                                      |                                   | 121.1             | 121.0                                                    | 121.0             |
|                                      |                                   | 153.7             | 158.8                                                    | 158.9             |
|                                      |                                   | 153.7             | 159.2                                                    | 158.9             |
| $\delta_{\text{iso}}(^{11}\text{B})$ | B <sub>1</sub><br>B <sub>2</sub>  | 31.1              | 31.6                                                     | 31.5              |
|                                      |                                   |                   | 31.5                                                     | 31.5              |
| $C_Q(^{11}\text{B})^3$               | B <sub>1</sub><br>B <sub>2</sub>  | 2.87              | 3.27                                                     | 3.27              |
|                                      |                                   |                   | 3.28                                                     | 3.28              |
| $\eta_Q(^{11}\text{B})$              | B <sub>1</sub><br>B <sub>2</sub>  | 0.48              | 0.56                                                     | 0.56              |
|                                      |                                   |                   | 0.56                                                     | 0.56              |
| $\delta_{\text{iso}}(^{17}\text{O})$ | O <sub>1</sub><br>O <sub>3</sub>  | N.D.              | 98.7                                                     | 99.9              |
|                                      |                                   |                   | 99.4                                                     | 99.9              |
| $C_Q(^{17}\text{O})^3$               | O <sub>2</sub><br>O <sub>4</sub>  | N.D.              | 69.9                                                     | 70.1              |
|                                      |                                   |                   | 69.9                                                     | 70.3              |
| $\eta_Q(^{17}\text{O})$              | O <sub>1</sub><br>O <sub>3</sub>  | N.D.              | 8.63                                                     | 8.62              |
|                                      |                                   |                   | 8.65                                                     | 8.63              |
|                                      | O <sub>2</sub><br>O <sub>4</sub>  | N.D.              | 6.62                                                     | 6.64              |
|                                      |                                   |                   | 6.58                                                     | 6.58              |
|                                      | O <sub>1</sub><br>O <sub>3</sub>  | N.D.              | 0.40                                                     | 0.40              |
|                                      |                                   |                   | 0.39                                                     | 0.40              |
| O <sub>2</sub><br>O <sub>4</sub>     | N.D.                              | 0.24              | 0.24                                                     |                   |
|                                      |                                   | 0.24              | 0.24                                                     |                   |

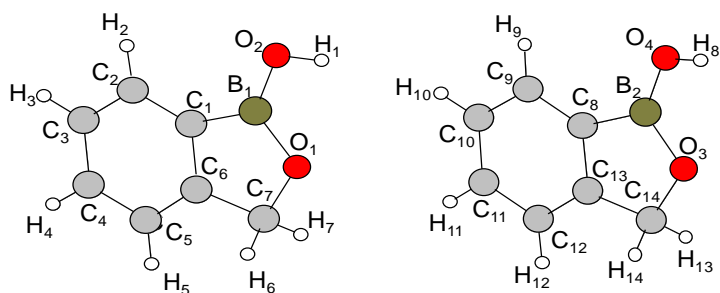

[1] CSD LOQQEN: *Tetrahedron Lett.* 1999, **40**, 6705 (polymorph characterized in this manuscript).

[2] CCDC 744739: *J. Phys. Chem. A*, 2010, **114**, 2324.

[3]  $C_Q$  values were calculated using  $Q(^{11}\text{B}) = 40.59$  mb.

**Table S9:** Comparison of the geometrical parameters in different periodic models of AN2690 after DFT relaxation, and in the two crystal structures reported so far.

|                  | AN2690 [1] |                                                    |                                                                          |                                                  | AN2690 [2] |                                                    |                                                                          |                                                  |
|------------------|------------|----------------------------------------------------|--------------------------------------------------------------------------|--------------------------------------------------|------------|----------------------------------------------------|--------------------------------------------------------------------------|--------------------------------------------------|
|                  | Expt [1]   | Calc<br>(for model obtained after VASP relaxation) | Calc<br>(for model obtained after Crystal09 relaxation (B3LYP-D*; BS-A)) | Calc<br>(for model obtained after QE relaxation) | Expt [2]   | Calc<br>(for model obtained after VASP relaxation) | Calc<br>(for model obtained after Crystal09 relaxation (B3LYP-D*; BS-A)) | Calc<br>(for model obtained after QE relaxation) |
| Distances (in Å) |            |                                                    |                                                                          |                                                  |            |                                                    |                                                                          |                                                  |
| B1-O1            | 1.388      | 1.405                                              | 1.401                                                                    | 1.406                                            | 1.392      | 1.404                                              | 1.401                                                                    | 1.405                                            |
| B1-O2            | 1.344      | 1.358                                              | 1.357                                                                    | 1.356                                            | 1.348      | 1.356                                              | 1.355                                                                    | 1.356                                            |
| O1-C7            | 1.446      | 1.453                                              | 1.447                                                                    | 1.471                                            | 1.447      | 1.449                                              | 1.443                                                                    | 1.470                                            |
| C7-C2            | 1.500      | 1.502                                              | 1.509                                                                    | 1.504                                            | 1.503      | 1.501                                              | 1.506                                                                    | 1.503                                            |
| C2-C1            | 1.393      | 1.404                                              | 1.405                                                                    | 1.409                                            | 1.395      | 1.406                                              | 1.402                                                                    | 1.409                                            |
| C1-B1            | 1.547      | 1.549                                              | 1.564                                                                    | 1.548                                            | 1.552      | 1.548                                              | 1.566                                                                    | 1.548                                            |
| C1-C6            | 1.397      | 1.401                                              | 1.401                                                                    | 1.404                                            | 1.401      | 1.400                                              | 1.389                                                                    | 1.404                                            |
| C6-C5            | 1.378      | 1.394                                              | 1.393                                                                    | 1.396                                            | 1.386      | 1.394                                              | 1.387                                                                    | 1.396                                            |
| C5-C4            | 1.377      | 1.393                                              | 1.394                                                                    | 1.395                                            | 1.383      | 1.394                                              | 1.386                                                                    | 1.395                                            |
| C4-F1            | 1.356      | 1.372                                              | 1.367                                                                    | 1.386                                            | 1.356      | 1.373                                              | 1.367                                                                    | 1.387                                            |
| C4-C3            | 1.372      | 1.388                                              | 1.388                                                                    | 1.390                                            | 1.382      | 1.387                                              | 1.382                                                                    | 1.389                                            |
| C3-C2            | 1.382      | 1.393                                              | 1.392                                                                    | 1.396                                            | 1.390      | 1.393                                              | 1.388                                                                    | 1.396                                            |
| O1...(H2)-O2     | 2.774      | 2.774                                              | 2.738                                                                    | 2.755                                            | 2.761      | 2.766                                              | 2.746                                                                    | 2.751                                            |
| O2-H2            | 0.859      | 0.991                                              | 0.986                                                                    | 1.007                                            | 0.832      | 0.992                                              | 0.984                                                                    | 1.007                                            |
| H2...O1          | 1.916      | 1.784                                              | 1.753                                                                    | 1.749                                            | 1.931      | 1.774                                              | 1.762                                                                    | 1.744                                            |
| Ω...Ω            | 4.028      | 4.028                                              | 4.028                                                                    | 4.028                                            | 3.880      | 3.880                                              | 3.880                                                                    | 3.880                                            |
| Angles (in °)    |            |                                                    |                                                                          |                                                  |            |                                                    |                                                                          |                                                  |
| O1-B1-O2         | 121.6      | 121.5                                              | 121.8                                                                    | 121.3                                            | 121.5      | 120.8                                              | 121.8                                                                    | 121.1                                            |
| O1-B1-C1         | 108.2      | 108.2                                              | 107.4                                                                    | 108.4                                            | 108.2      | 108.3                                              | 107.2                                                                    | 108.4                                            |
| B1-C1-C2         | 105.2      | 105.1                                              | 105.2                                                                    | 105.4                                            | 104.9      | 105.0                                              | 105.3                                                                    | 105.3                                            |
| C1-C2-C7         | 110.6      | 110.8                                              | 110.7                                                                    | 110.9                                            | 110.9      | 110.8                                              | 110.6                                                                    | 110.9                                            |
| C2-C7-O1         | 105.5      | 105.6                                              | 105.4                                                                    | 105.3                                            | 105.5      | 105.7                                              | 105.6                                                                    | 105.3                                            |
| B1-O1...(H2)-O2  | 126.2      | 127.2                                              | 126.2                                                                    | 127.7                                            | 126.4      | 126.9                                              | 125.7                                                                    | 127.5                                            |
| O2-H2-O1         | 176.7      | 177.0                                              | 177.3                                                                    | 177.0                                            | 175.4      | 178.6                                              | 177.5                                                                    | 177.5                                            |

[1] This work (CCDC 986106).

[2] I. D. Madura, A. Adamczyk-Wozniak, M. Jakubczyk and A. Sporzynski, *Acta Cryst.* 2011, **67**, 414.

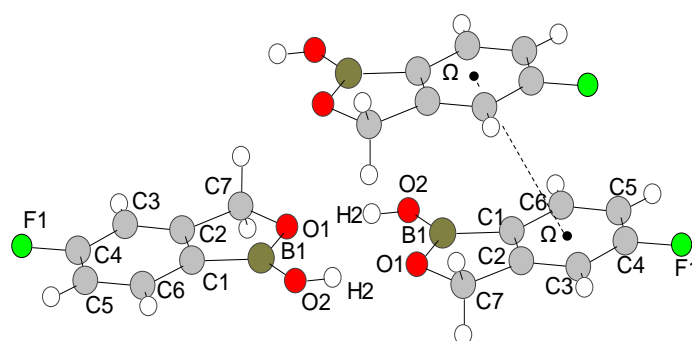

Supplement: c4ce00313f1.pdf [file c4ce00313f1.pdf]
